# Supplementary material
Source: MDPI journal article supplement (https://www.mdpi.com/2412-382X/5/4/28)
Supplement: s1 [file s1]

# Analysis of Cr(VI) Bioremediation by *Citrobacter freundii* Using Synchrotron Soft X-ray Scanning Transmission X-ray Microscopy

Amith G. Anil <sup>1</sup>, Sufal Swaraj <sup>2</sup>, Sankaran Subramanian <sup>1,\*</sup> and Praveen C. Ramamurthy <sup>1,\*</sup>

<sup>1</sup> Department of Materials Engineering, Indian Institute of Science, Bangalore 560012, India; amithanil@iisc.ac.in

<sup>2</sup> Synchrotron SOLEIL, L'Orme des Merisiers, Saint-Aubin-BP 48, CEDEX, F-91192 Gif-sur-Yvette, France; sufal.swaraj@synchrotron-soleil.fr

\* Correspondence: ssmani@iisc.ac.in (S.S.); praveen@iisc.ac.in or onegroupb203@gmail.com (P.C.R.)

## Bacterial Strain and Culture Medium Preparation

Pure strain of *Citrobacter freundii* (MTCC No. 8128) was obtained from Institute of Microbial Technology (IMTECH), Chandigarh, India. pH 7 nutrient broth (NB) medium was used for culturing of the cells. NB medium was prepared as follows: 2 g yeast extract, 1 g beef extract, 5 g peptone and 5 g sodium chloride (NaCl) were homogenised in 900 mL of deionised water. 100 mL of freshly inoculated cells were added to the medium. The pH of the mixture was adjusted to 7 using 0.5 M HCl and 0.5 M NaOH. The culture medium was incubated at 30 °C in an Orbitek orbital shaker for 24 h. The bacterial cells were then centrifuged out of the medium at 10,000 rpm for 10 min. The pelletised cells were then washed thoroughly with deionized water and air dried before use.

## STXM-NEXAFS Absorption Features of Samples and References

**Table S1.** X-ray absorption features of biosorbed cells and standard samples.

| Sample                                                 | X-ray Absorption (eV) |                      |                                        |                                | FWHM of $\pi^*$ peak (eV) | FWHM of L3 peak (eV) |      |
|--------------------------------------------------------|-----------------------|----------------------|----------------------------------------|--------------------------------|---------------------------|----------------------|------|
|                                                        | O K-Edge              |                      | Cr L-Edge                              |                                |                           |                      |      |
|                                                        | $\pi^*$               | $\sigma^*$           | L3                                     | L2                             |                           |                      |      |
| Biosorbed Cell                                         | 531.59                | 534.58, 536.53       | 575.06, 576.11, 577.32, 578.37, 580.17 | 582.58, 585.29, 587.09         | 1.36                      | 3.17                 |      |
| Pristine Cell                                          | 531.7                 | 535, 538.8, 546      | N.A.                                   | N.A.                           | 1.12                      | N.A.                 |      |
| K <sub>2</sub> Cr <sub>2</sub> O <sub>7</sub> [Cr(VI)] | 528, 530              | 536.4, 537.6, 540.37 | 577.29, 580.05                         | 586.73, 588.64                 | 1.55 (528eV)              | 1.43                 |      |
| Cr(OH) <sub>3</sub>                                    | 532.4                 | 541.36, 543.34       | 575.15, 576.18, 577.21, 578.24         | 585.3, 587.21                  | 1.86                      | 3.64                 |      |
| Cr <sub>2</sub> O <sub>3</sub>                         | 531.2                 |                      | 533.2, 538, 542.35, 545.31             | 575.15, 575.92, 576.96, 578.24 | 584.94, 586.26, 587.21    | 1.74                 | 6.03 |

**Table S2.** Intensity ratio of L3 and L2 peak for samples and references. (Ratio taken at L3:577 eV and L2: 585 eV).

| Sample                         | L3/L2 Ratio |
|--------------------------------|-------------|
| Cr(OH) <sub>3</sub>            | 1.6         |
| Cr <sub>2</sub> O <sub>3</sub> | 1.2         |
| 200ppm                         | 1.7         |
| 400ppm                         | 1.8         |
| 600ppm                         | 1.8         |

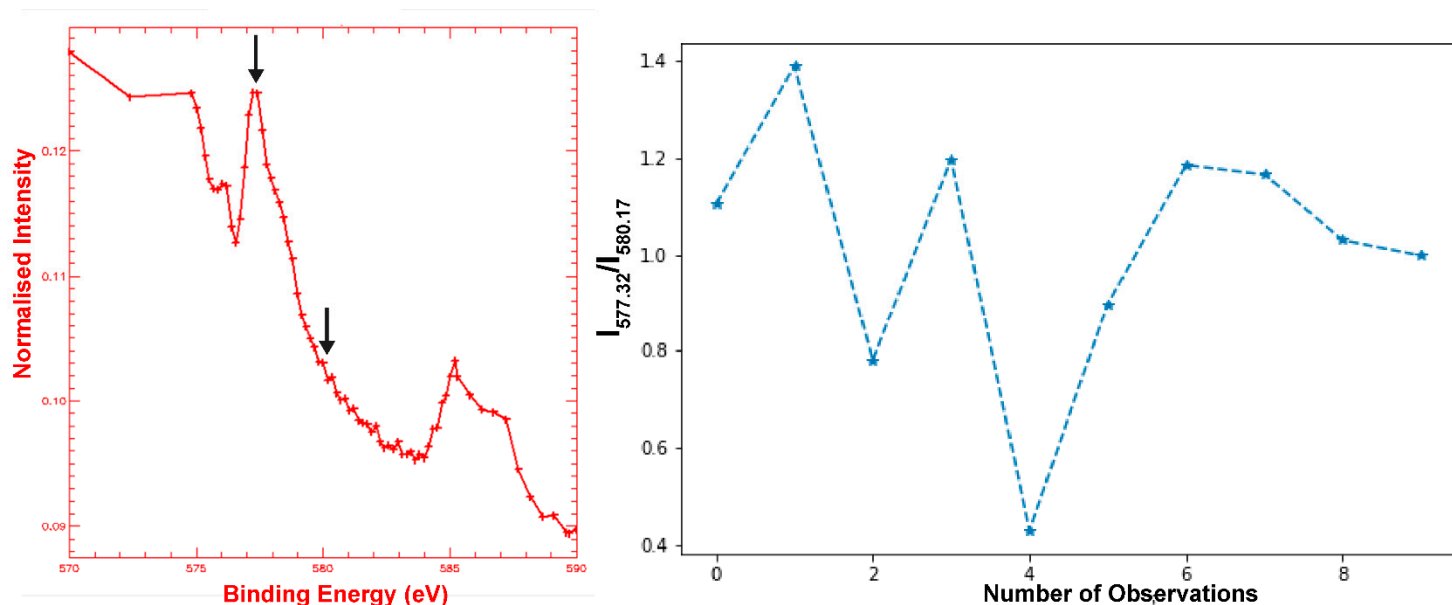

**Figure S1.** Ratio of absorption intensity at 577.3 eV [Cr(III)] and 580.2 eV [Cr(VI)] at various regions of 400 ppm sample.

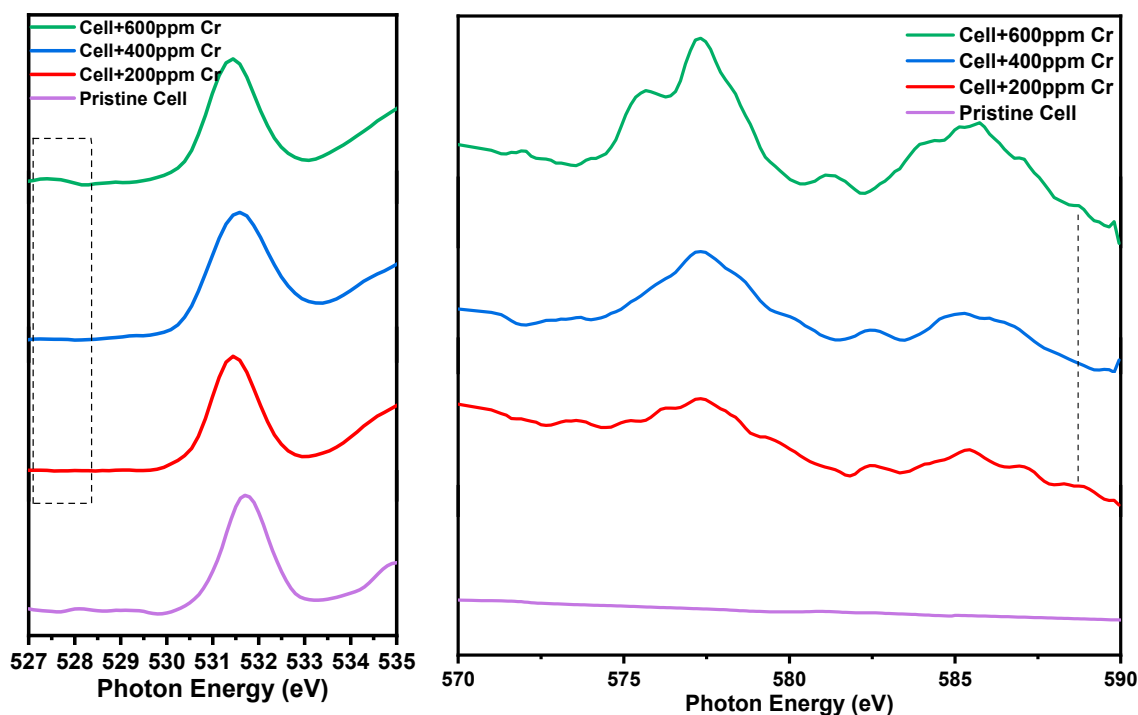

**Figure S2.** Zoomed in spectra of O Kedge and Cr Ledge absorption of biosorbed cells. The low energy bump around 527 eV and high energy bump at 588 eV corresponding to Cr(VI) is seen in 400 ppm and 600 ppm sample.
